# Supplementary material for: Genetic analysis of multiple sclerosis severity identifies a novel locus and implicates CNS resilience as a major determinant of outcome
Source: Research Square preprint supplement (doi:10.21203/rs.3.rs-1723574/v1), 2022-06-10
Supplement: Supplementary file 1 [file 0154f60eaa7946048b1abe95.pdf]

Cohort-level  
sample QC

Stratum-level  
sample QC

**a**

21 centers and single genotyping platform (N = 15,072)

1,009 excluded (excess  
missingness or heterozygosity,  
relatedness, sex discordance)

14,063 participants merged into a single stratum  
for phasing and imputation

658 excluded (relatedness,  
population outliers)

878 excluded  
(missing EDSS)

**12,584 cases included in the discovery population**

**b**

Cohort-level  
sample QC

Stratum-level  
sample QC

9 centers and various genotyping platforms (N = 29,257)

672 excluded (excess  
missingness or heterozygosity,  
relatedness, sex discordance)

28,585 participants grouped into four strata  
for phasing and imputation

1,798 excluded (relatedness,  
population outliers)

16,917 excluded (control  
status, missing EDSS, overlap  
with discovery)

**9,805 cases included in the replication population**
