# Supplementary material for: Genetic analysis of multiple sclerosis severity identifies a novel locus and implicates CNS resilience as a major determinant of outcome
Source: Research Square preprint supplement (doi:10.21203/rs.3.rs-1723574/v1), 2022-06-10
Supplement: Supplementary file 1 [file 5866de23ef20b76c2f3ef9e9.docx]

**Supplementary Material**

**Genetic analysis of multiple sclerosis severity identifies a novel locus and implicates CNS resilience as a major determinant of outcome**

International Multiple Sclerosis Genetics Consortium, MultipleMS Consortium

**Supplementary Information Inventory**

This file contains the following:

- Supplementary Note
- Supplementary Figures 1-5
- Consortia members
- Supplementary References

**SUPPLEMENTARY NOTE**

**Discovery and replication populations quality control**

While the discovery population consisted exclusively of patients with MS, the replication population included MS cases and controls assembled as part of the MultipleMS consortium. To maximize subsequent phasing and imputation accuracy, all individuals were included in the quality control process. MS cases without disability measures and controls were excluded following imputation and did not contribute to the analyses (**Extended Data Fig. 1**).

*Cohort-level quality control.* Each cohort was mapped to the hg19 reference genome and oriented to the forward strand, using strand information from the Illumina array manifest files. Mitochondrial variants and insertions and deletions were excluded. We removed individuals with sample missingness greater than 0.05. We also removed individuals with a mismatch between genetic and reported sex, after selecting a linkage disequilibrium (LD) pruned (PLINK1 --indep-pairphase 20000 2000 0.5) set of high-quality chromosome X variants with missingness < 0.02 and minor allele frequency (MAF) > 0.05. Following inspection of chromosome X F statistic histograms, thresholds for genetic sex determination were set to < 0.55 for females and > 0.8 for males. In the replication population, 4 out of 17 cohorts did not include sex chromosome data.

To account for the effects of population structure2, we performed variant quality control using the subset of participants drawn from the largest ancestral group in each cohort. To define this group, we first selected high confidence autosomal markers based on the following criteria:

- MAF > 0.05,
- Genotype missingness < 0.01,
- Hardy Weinberg equilibrium P > 10-10,
- Non-palindromic variants (excluding AT or CG variants),
- Retained following LD-pruned (PLINK23 --indep-pairwise 1000 kb 1 0.01),
- Outside regions with high principal component (PC) loadings4,
- Common with 1000 Genomes phase 35.

The resulting set of variants were used to compute PC loadings from 2,534 unrelated (PLINK2 --king-cutoff 0.1) individuals from 1000 Genomes phase 3, onto which samples from each cohort were projected. Clustering was then performed on the PCs using the ‘aberrant’ package6 in R, setting the parameter lambda to 30. The largest group comprised 85-100% of cohort participants closely matching the 1000 Genomes European superpopulation. The following variant filter criteria were then applied:

- Genotype missingness < 0.02 (0.05 in the replication cohort; threshold based on inspection of the empirical cumulative distribution function),
- Deviation from HWE P > 10-10 (10-6 for controls in the replication cohorts),
- MAF > 0.01,
- In the discovery only, between-cohort absolute allele frequency difference < 0.1 and absolute log2 fold-change < 5,
- In the replication only, differential missingness between cases and controls P > 10-4.

For the sample quality control, we excluded individuals with an absolute inbreeding coefficient > 0.05, as well as those needed to resolve pairs of relatedness at the third degree or closer (PLINK2 --king-cutoff 0.0442). Finally, cohorts were merged into strata based on genotyping platforms (n=1 for discovery, n=4 for replication).

*Stratum-level quality control.* Stringent sample quality control was applied to each stratum. Cross-cohort duplicates and related samples were removed following the same approach as above. Population structure was assessed using a two-step approach. We applied PC analysis (PCA) as implemented in EIGENSOFT7 to exclude outliers (> 6 standard deviations from stratum mean on PC1-10 across 5 iterations). Second, we calculated PCs on all 1000 Genomes phase 3 samples, projected our samples onto that space and excluded outliers that fell 6 standard deviations away from the mean of the European 1000 Genomes superpopulation (N=503) on PC1-10. PCs after removal of outliers are presented in **Extended Data Fig. 3** and **Supplementary Fig. 1**.

Additional variant quality control was performed by applying the following criteria:

- Genotype missingness < 0.05,
- Deviation from HWE P > 10-10,
- For palindromic variants, alternate allele frequency < 0.4 or > 0.6,
- Absolute alternate allele frequency difference < 0.2 compared to European samples in the Haplotype Reference Consortium (HRC; version 1.1) imputation reference panel8.

The number of variants and individuals passing quality control prior to imputation is described in **Supplementary Tables 3 and 4**.

*Phasing and imputation.* Phasing was performed using Eagle2 (version v2.4.1) in chunks of 20 Mb with 5 Mb overlapping flanking regions. The parameter for number of conditioning haplotypes (--Kpbwt, default 10,000) was set to 20,000, with other parameters kept as default. Stratum samples were merged with HRC (n = 27,166) to maximize accuracy. Imputation of the phased genotypes was then performed using Minimac49. We applied a range of analyses to examine chromosome continuity, imputation quality by chromosome position and allele frequency difference compared to the reference panel. Across strata, the median imputation quality (*R2*) was 0.965 to 0.985 for MAF ≥ 0.01 and the median imputation accuracy for genotyped variants (EmpR) was 0.977 to 0.997. Imputed variants with MAF < 0.01 or *R2* < 0.3 were excluded, resulting in a total of 7,722,279 to 7,830,995 autosomal variants for further analysis (**Supplementary Fig. 2** and **Supplementary Table 4**).

**Supplementary Figure 1 | Principal component projections per stratum including 1000 Genomes reference populations. a**, Principal component scores for African (AFR), East Asian (EAS) and European (EUR) samples in 1000 Genomes phase 3. **b-f**, Using a common set of high-quality variants, individuals included in the GWAS following quality control are plotted along their projected principal components (red) based on the same 1000 Genomes reference populations (gray). Stratum 1 (**b**) corresponds to the discovery population, whereas strata 2 through 5 (**c-f**) represent the replication population. Cases consistently overlap with the European cluster in 1000 Genomes.

**Supplementary Figure 2 | Imputation quality and accuracy.** To estimate imputation accuracy, we examined the empirical correlation (EmpR) between true genotypes and imputed dosages for directly genotyped variants. The imputation quality genome-wide was evaluated using the square correlation (Rsq) between imputed dosages and true, unobserved genotypes. Left, EmpR and Rsq metrics are presented for variants with MAF > 0.01; Right, Rsq distribution for imputed variants with MAF > 0.01 and Rsq ≥ 0.3. Data are presented for the discovery population (**a**) and each of the four strata part of the replication population (**b-e**). MAF, minor allele frequency.

**Supplementary Figure 3 | Quantile-quantile plot for the ARMSS score discovery GWAS.** Quantile-quantile plot of the observed -log10(*P*) versus the expectation under the null hypothesis. The genomic control inflation factor (λGC) was 1.016, while the LD score regression intercept was not significantly different from 1 (1.009, 95% CI 0.996 to 1.022). ARMSS, age-related MS severity; CI, confidence interval; LD, linkage disequilibrium.

**Supplementary Figure 4 | ARMSS score and age at onset.** Earlier age at onset is associated with increased MS severity when comparing individuals of the same age. Analysis was performed using linear regression adjusted for age, sex, date of birth, EDSS source, center, genotyping batch and the first ten principal components. *R2* represents the gain in coefficient of determinant (incremental *R2*) when age at onset is added as a variable to a regression of ARMSS score on the baseline covariates. ARMSS, age-related MS severity score.


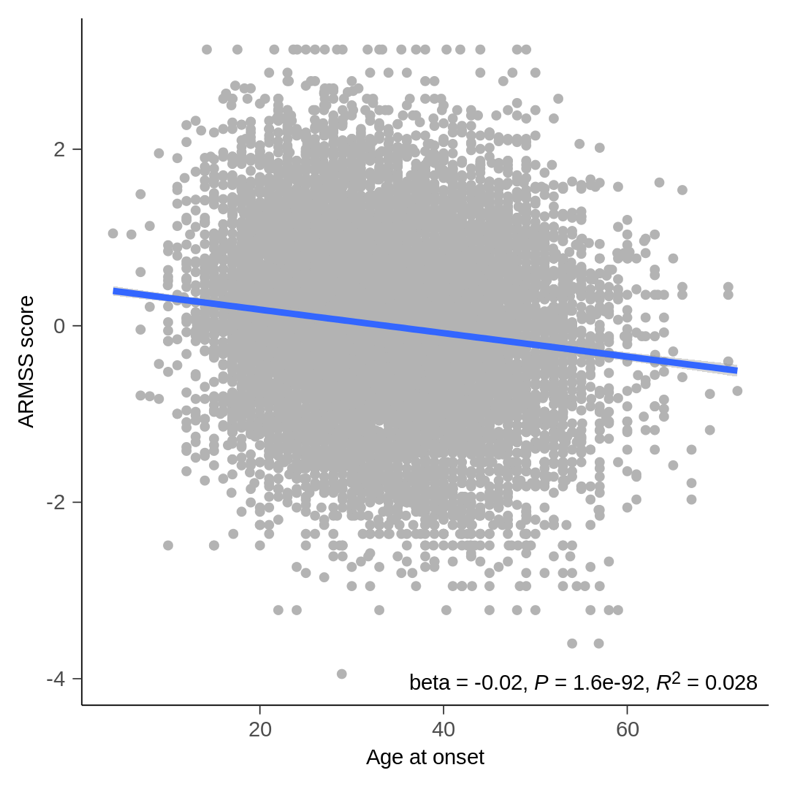


**Supplementary Figure 5 | ARMSS score and MS susceptibility PRS. a**, An increased burden of MS susceptibility variants as reflected by the PRS modestly increased ARMSS scores. This effect was similar for MHC and non-MHC variants. **b**, The MS susceptibility PRS displayed a stronger inverse association with age at onset. **c**, Adjustment for age of onset, in addition to baseline covariates, led to attenuation of the effect of the MS susceptibility PRS on ARMSS scores. *R2* values represent the gain in coefficient of determinant (incremental *R2;* Methods). ARMSS (including residualized) and PRS scores were standardized to facilitate comparison between panels. ARMSS, age-related multiple sclerosis severity score; MHC, major histocompatibility complex; PRS, polygenic risk score.

**CONSORTIA MEMBERS**

All authors are listed at the end of the main manuscript. In addition to those authors, these lists recognize the involvement of consortium members who did not directly contribute to the paper. Individuals may be part of one or both consortia.

**Members of the International Multiple Sclerosis Genetics Consortium**

Lars Alfredsson1, Katayoun Alikhani2, Till F. M. Andlauer3, Maria Ban4, Sergio E. Baranzini5, Lisa F. Barcellos6, Nadia Barizzone7, Ashley H. Beecham8, Tone Berge9, Luisa Bernardinelli10, Achim Berthele3, Stefan Bittner11, Steffan D. Bos12, Farren Briggs13, Stacy J. Caillier5, Domenico Caputo14, Paola Cavalla15, Elisabeth G. Celius12, Tanuja Chitnis16, Ferdinando Clarelli17, Manuel Comabella18, Giancarlo Comi19, Alastair Compston4, Chris Cotsapas20, Bruce C. A. Cree5, Sandra D’Alfonso7, Efthimios Dardiotis21, Philip L. De Jager22, Silvia R. Delgado23, Bénédicte Dubois24, Sinah Engel11, Federica Esposito25, Marzena J. Fabis-Pedrini26, Massimo Filippi27, Christiane Gasperi3, Lissette Gomez8, Refujia Gomez5, An Goris24, Pierre-Antoine Gourraud28, Georgios Hadjigeorgiou29, David A. Hafler30, Jonathan L. Haines31, Hanne F. Harbo12, Adil Harroud5, Stephen L. Hauser5, Friederike Held3, Bernhard Hemmer3, Roland G. Henry5, Jan Hillert1, Dana Horakova32, Noriko Isobe33, Maja Jagodic1, Seema Kalra34, Allan G. Kermode26, Michael Khalil35, Trevor J. Kilpatrick36, Ingrid Kockum1, Ioanna Konidari8, Karim L. Kreft37, Jeannette Lechner-Scott38, Maurizio Leone39, Felix Luessi11, Sunny Malhotra18, Ali Manouchehrinia1, Clara P. Manrique8, Roland Martin40, Filippo Martinelli-Boneschi41, Elisabetta Mascia17, Jacob L. McCauley8, Luanne M. Metz2, Luciana Midaglia18, Xavier Montalban18, Jorge R. Oksenberg5, Tomas Olsson1, Annette Oturai42, Kimmo Pääkkönen43, Grant P. Parnell44, Nikolaos A. Patsopoulos45, Margaret A. Pericak-Vance8, Fredrik Piehl1, Justin P. Rubio36, Janna Saarela43, Adam Santaniello5, Silvia Santoro17, Stephen J. Sawcer4, Catherine Schaefer46, Finn Sellebjerg42, Hengameh Shams5, Klementy Shchetynsky47, Claudia Silva2, Vasileios Siokas21, Joost Smolders48, Helle B. Søndergaard42, Melissa Sorosina17, Graeme J. Stewart49, Pernilla Stridh1, Bruce Taylor50, Marijne Vandebergh24, Domizia Vecchio51, Margarete M. Voortman35, Howard L. Weiner16, V. Wee Yong2, Frauke Zipp11.

1Department of Clinical Neuroscience, Karolinska Institutet, Center for Molecular Medicine, Karolinska University Hospital, Stockholm, Sweden. 2Department of Clinical Neurosciences and the Hotchkiss Brain Institute, University of Calgary, Calgary, Canada. 3Department of Neurology, School of Medicine, Technical University of Munich, Munich, Germany. 4Department of Clinical Neurosciences, University of Cambridge, Cambridge, UK. 5UCSF Weill Institute for Neurosciences, Department of Neurology, University of California, San Francisco, San Francisco, CA, USA. 6Genetic Epidemiology and Genomics Laboratory, Division of Epidemiology, School of Public Health, University of California, Berkeley, Berkeley, CA, USA. 7Department of Health Sciences and Center on Auto-immune and Allergic Diseases (CAAD), University of Eastern Piedmont, Novara, Italy. 8John P Hussman Institute for Human Genomics, Miller School of Medicine, University of Miami, Miami, FL, USA. 9Department of Research, Innovation and Education, Oslo University Hospital, Oslo, Norway. 10Department of Brain and Behavioral Sciences, University of Pavia, Pavia, Italy. 11Department of Neurology, Focus Program Translational Neuroscience (FTN) and Immunotherapy (FZI), University Medical Center of the Johannes Gutenberg University Mainz, Mainz, Germany. 12Department of Neurology, Oslo University Hospital, Oslo, Norway. 13Department of Population and Quantitative Health Sciences, School of Medicine, Case Western Reserve University, Cleveland, OH, USA. 14IRCCS Fondazione Don Gnocchi ONLUS, Milano, Italy. 15Department Neuroscience and Mental Health, City of Health and Science University Hospital of Turín, Turín, Italy. 16Brigham Multiple Sclerosis Center, Brigham and Women’s Hospital, Boston, MA, USA. 17Laboratory of Human Genetics of Neurological Disorders, IRCCS San Raffaele Scientific Institute, Milan, Italy. 18Servei de Neurologia-Neuroimmunologia, Centre d’Esclerosi Múltiple de Catalunya (Cemcat), Vall d’Hebron Institut de Recerca, Vall d’Hebron Hospital Universitari, Barcelona, Spain. 19Vita-Salute San Raffaele University, Milan, Italy. 20Departments of Neurology and Genetics, Yale School of Medicine, New Haven, CT, USA. 21Department of Neurology, University General Hospital of Larissa, Faculty of Medicine, School of Health Sciences, University of Thessaly, Larissa, Greece. 22Center For Translational & Computational Neuroimmunology and the Multiple Sclerosis Center, Department of Neurology, Columbia University Irving Medical Center, New York, NY, USA. 23Multiple Sclerosis Division, Department of Neurology, Miller School of Medicine, University of Miami, Miami, FL, USA. 24KU Leuven, Leuven Brain Institute, Department of Neurosciences, Leuven, Belgium. 25Neurology Unit and Laboratory of Human Genetics of Neurological Disorders, IRCCS San Raffaele Scientific Institute, Milan, Italy. 26Perron Institute for Neurological and Translational Science, University of Western Australia, Perth, Australia. 27Neurology Unit, Neurorehabilitation Unit, Neurophysiology Service and Neuroimaging Research Unit, IRCCS San Raffaele Scientific Institute, Milan, Italy. 28Université de Nantes, CHU Nantes, Inserm, Centre de Recherche en Transplantation et Immunologie, Nantes, France. 29Medical School, University of Cyprus, Nicosia, Cyprus. 30Departments of Neurology and Immunobiology, Yale School of Medicine, New Haven, CT, USA. 31Case Western Reserve University School of Medicine, Cleveland, Ohio, USA. 32Department of Neurology and Center of Clinical Neuroscience, First Faculty of Medicine and General University Hospital, Charles University in Prague, Prague, Czech Republic. 33Department of Neurology, Graduate School of Medical Sciences, Kyushu University, Fukuoka, Japan. 34Royal Stoke MS Centre, University Hospitals of North Midlands NHS Trust, Royal Stoke University Hospital, Newcastle Road, Stoke-on-Trent, UK. 35Department of Neurology, Medical University of Graz, Graz, Austria. 36Florey institute of Neuroscience and Mental Health, Melbourne, Australia. 37Department of Neurology, MS center ErasMS, Erasmus University Medical Center, Rotterdam, Netherlands. 38Department of Neurology, John Hunter Hospital, Hunter New England Health District, Newcastle, Australia. 39SC Neurologia, Dipartimento di Scienze Mediche, IRCCS Casa Sollievo della Sofferenza, San Giovanni Rotondo, Foggia, Italy. 40Neuroimmunology and Multiple Sclerosis Research Section, Neurology Clinic, University Hospital Zurich & University of Zurich, Zurich, Switzerland. 41IRCCS Fondazione Ca’ Granda Ospedale Maggiore Policlinico, Neurology Unit, Milan, Italy. 42Danish Multiple Sclerosis Center, Department of Neurology, Copenhagen University Hospital - Rigshospitalet, Glostrup, Denmark.43Institute for Molecular Medicine Finland, Helsinki Institute for Life Sciences, University of Helsinki, Helsinki, Finland. 44School of Medical Sciences, Faculty of Medicine and Health, The University of Sydney, Sydney, Australia. 45Systems Biology and Computer Science Program, Ann Romney Center for Neurological Diseases, Department of Neurology, Brigham & Women’s Hospital, Boston, MA, USA. 46Kaiser Permanente Division of Research, Oakland, CA, USA. 47Department of Neurology, Yale School of Medicine, New Haven, CT, USA. 48Departments of Neurology and Immunology, MS center ErasMS, Erasmus University Medical Center, Rotterdam, Netherlands. 49Westmead Institute for Medical Research, Sydney, Australia. 50Menzies Institute for Medical Research, University of Tasmania, Hobart, Australia. 51Department of Translational Medicine and Interdisciplinary Research Center of Autoimmune Diseases (IRCAD), University of Eastern Piedmont, Novara, Italy.

**Members of the MultipleMS Consortium**

Ana-Katharina Klein1, Imad Abugessaisa2, Amber Alexander3, Jeppe Sonne Andersen4, Till F. M. Andlauer1, Jennifer Arjona3, Amie Baker5, Maria Ban5, Sergio E. Baranzini3, Stephan Beck6, Pål Berg-Hansen7, Tone Berge7, Anna Berntson8, Mona Beyer7, Viola Biberacher1, Yolanda Blanco9, Anna Blazier10, Steffan D. Bos7, Rune Brautaset11, Sophie Buhelt 4, Cecilia Byström11, Lynn Castelot12, Elisabeth G. Celius7, Ambra Cerri13, Wojciech Chacholski8, Clement Chatelain10, Ferdinando Clarelli14, Noah Connally12, Andrea Corona15, Chris Cotsapas12, Sandra D’Alfonso16, Amy Dao12, Kati Donner17, Bénédicte Dubois18, Simone Ecker6, Anita Eliasson19, Federica Esposito14, Begoña Fernandez9, Mika Frederiksen17, Lars Fugger20, Guro Gafvelin11, Christiane Gasperi1, David Gomez-Cabrero2, Javier Gonzalo9, An Goris18, Tobias Granberg11, Kim Grasboeck1, Courtney Grimm12, Hans Grönlund11, Verena Grummel1, Clara Guaschino14, Maria Gustafsson8, Stefan Gustavsen4, Alexandra Gyllenberg11, Hanne F. Harbo7, Peter Harrison21, Adil Harroud3, Bernhard Hemmer1, Roland Henry3, Sari Honkanen17, Maja Jagodic11, Sophie Janacek21, Jean Jones3, Ingileif Jónsdóttir22, Seema Kalra23, Timo Kanninen19, Rajinder Kaul12, Tobias Keiner1, Anisha Keshavan3, Narsis Kiani2, Kicheol Kim3, Gina Kirkish3, Benedikt Knier1, Ingrid Kockum11, Myrto Kostadima21, Adrian Lang1, Annika Langkilde4, Ferre Laura14, Maurizio Leone24, Gildas Lepentier1, Tony Lewis5, Cecilia Lindgren25, Eva Lindström11, Sara Llufriu9, Lohith Madireddy3, Ali Manouchehrinia11, Filippo Martinelli-Boneschi15, Elena H Martinez-Lapiscina9, Meoni Massimiliano14, Diana Maxwell8, Timo Miettinen17, Thomas Moridi11, Alisha Mota12, Sinéad Moylett18, Mark Mühlau1, Shaun Muzic3, Maria Needhamsen11, Maria Nilsson11, Mathieu Niquille26, Dimitry Ofengeim10, Anna Gabriella Olsson4, Tomas Olsson11, Ana Maria Osiceanu14, Annette Oturai4, Kimmo Pääkkönen17, Staffan Paulie27, Fredrik Piehl11, Laura Planas9, Albert Pukaj1, Renate Raedlein1, Ryan Ramanujam8, Marianne Randen7, Philippe Rocolle10, Philip Rosensteil28, Janna Saarela17, Albert Saiz9, Silvia Santoro14,14, Stephen Sawcer5, Finn Sellebjerg4, Klementy Shchetynsky12, Parisa Shooshtari12, Gilad Silberberg2, Emma Sinha21, Helle B. Søndergaard4, Melissa Sorosina14, Ingvild Sorum7, Kári Stefánsson22, Pernilla Stridh11, Miljana Tanic6, Jesper Tegnér2, Päivi Tikka-Kleemola19, Lori Kim Tonnes-Priddy12, Anusha Uppinkudru1, Gemma Vila9, Pablo Villoslada9, Amy Webster6, Martina Wenzel1, Mathew Woodwark29, Andrea Zauli14, Daniel Zerbino21, Mindy Zhang10, Galina Zheleznyakova11, Nikolay Zhukovsky26, Iaroslav Zinevych1, Frauke Zipp30, Irati Zubizarreta9.

1Department of Neurology, School of Medicine, Technical University of Munich, Munich, Germany. 2Karolinska Institutet, Stockholm, Sweden. 3UCSF Weill Institute for Neurosciences, Department of Neurology, University of California, San Francisco, San Francisco, CA, USA. 4Danish Multiple Sclerosis Center, Department of Neurology, Copenhagen University Hospital, Rigshospitalet, Glostrup, Denmark. 5Department of Clinical Neurosciences, University of Cambridge, Cambridge, UK. 6University College London, London, UK. 7Department of Neurology, Oslo University Hospital, Oslo, Norway. 8KTH-The Royal Institute of Technology, Stockholm, Sweden. 9Department of Neurology, Hospital Clinic Barcelona and Institut d’Investigacions Biomediques August Pi Sunyer (IDIBAPS), Barcelona, Spain. 10SANOFI, Chilly-Mazarin, France. 11Department of Clinical Neuroscience, Karolinska Institutet, Center for Molecular Medicine, Karolinska University Hospital, Stockholm, Sweden. 12Altius Institute for Biomedical Sciences, Seattle, WA, USA. 13IRCCS Policlinico San Donato. 14Neurology Unit and Laboratory of Human Genetics of Neurological Disorders, IRCCS San Raffaele Scientific Institute, Milan, Italy. 15IRCCS Fondazione Ca’ Granda Ospedale Maggiore Policlinico, Neurology Unit, Milan, Italy. 16University of Eastern Piedmont, Novara, Italy. 17Institute for Molecular Medicine Finland, Helsinki Institute for Life Sciences, University of Helsinki, Helsinki, Finland. 18KU Leuven, Leuven Brain Institute, Department of Neurosciences, Leuven, Belgium. 19BC Platforms, Zurich, Switzerland. 20Oxford Centre for Neuroinflammation, Nuffield Department of Clinical Neurosciences, Oxford University Hospitals, University of Oxford, Oxford, UK. 21European Molecular Biology Laboratory, European Bioinformatics Institute, Wellcome Genome Campus, Cambridge, UK. 22deCODE Genetics/Amgen, Inc., Reykjavik, Iceland. 23Royal Stoke MS Centre, University Hospitals of North Midlands NHS Trust, Royal Stoke University Hospital, Newcastle Road, Stoke-on-Trent, UK. 24Fondazione IRCCS Casa Sollievo Della Sofferenza, San Giovanni Rotondo, Italy. 25Big Data Institute, Li Ka Shing Center for Health Information and Discovery, Oxford University, Oxford, UK. 26NEURIX, Geneva, Switzerland. 27Mabtech AB, Nacka Strand, Sweden. 28Institute of Clinical Molecular Biology, Kiel University and University Medical Center Schleswig-Holstein, Campus Kiel, Kiel, Germany. 29MedImmune, Gaithersburg, MD, USA. 30Department of Neurology, Focus Program Translational Neuroscience (FTN) and Immunotherapy (FZI), University Medical Center of the Johannes Gutenberg University Mainz, Mainz, Germany.

**SUPPLEMENTARY REFERENCES**

1. Purcell, S. *et al.* PLINK: a tool set for whole-genome association and population-based linkage analyses. *Am. J. Hum. Genet.* **81**, 559–575 (2007).

2. Bycroft, C. *et al.* The UK Biobank resource with deep phenotyping and genomic data. *Nature* **562**, 203–209 (2018).

3. Chang, C. C. *et al.* Second-generation PLINK: rising to the challenge of larger and richer datasets. *GigaScience* vol. 4 (2015).

4. Anderson, C. A. *et al.* Data quality control in genetic case-control association studies. *Nature Protocols* vol. 5 1564–1573 (2010).

5. 1000 Genomes Project Consortium *et al.* A global reference for human genetic variation. *Nature* **526**, 68–74 (2015).

6. Bellenguez, C. *et al.* A robust clustering algorithm for identifying problematic samples in genome-wide association studies. *Bioinformatics* **28**, 134–135 (2012).

7. Price, A. L. *et al.* Principal components analysis corrects for stratification in genome-wide association studies. *Nat. Genet.* **38**, 904–909 (2006).

8. McCarthy, S. *et al.* A reference panel of 64,976 haplotypes for genotype imputation. *Nat. Genet.* **48**, 1279–1283 (2016).

9. Das, S. *et al.* Next-generation genotype imputation service and methods. *Nat. Genet.* **48**, 1284–1287 (2016).
