# Supplementary material for: Genetic analysis of multiple sclerosis severity identifies a novel locus and implicates CNS resilience as a major determinant of outcome
Source: Research Square preprint supplement (doi:10.21203/rs.3.rs-1723574/v1), 2022-06-10
Supplement: Supplementary file 2 [file 0343e27fe05d40d94f590098.pdf]

**Supplementary Table 2. Demographic characteristics by population**

| Variable                  | n     | Discovery <sup>b</sup> | n    | Replication <sup>b</sup> | p-value <sup>c</sup> | SMD   |
|---------------------------|-------|------------------------|------|--------------------------|----------------------|-------|
| Female                    | 12584 | 9023 (71.7%)           | 9805 | 7045 (71.9%)             | 0.81                 | 0.003 |
| Disease course            | 11626 |                        | 9064 |                          | <0.0001              | 0.081 |
| relapsing onset           |       | 10630 (91.4%)          |      | 8481 (93.6%)             |                      |       |
| primary progressive       |       | 996 (8.6%)             |      | 583 (6.4%)               |                      |       |
| Age at EDSS <sup>a</sup>  | 12584 | 51.7 (11.8)            | 9805 | 47.2 (12.4)              | <0.0001              | 0.377 |
| Age at onset              | 12453 | 33.6 (10.2)            | 8252 | 32.5 (10.3)              | 0.005                | 0.109 |
| Disease duration          | 12453 | 18.2 (10.6)            | 8252 | 15.8 (10.8)              | <0.0001              | 0.229 |
| EDSS <sup>a</sup>         | 12584 | 3.54 (2.43)            | 9805 | 3.36 (2.37)              | <0.0001              | 0.076 |
| ARMSS <sup>a</sup>        | 12584 | 4.23 (2.77)            | 9805 | 4.57 (2.82)              | <0.0001              | 0.122 |
| Disease modifying therapy | 7857  |                        | 3602 |                          | <0.0001              | 0.911 |
| never treated             |       | 766 (9.7%)             |      | -                        |                      |       |
| no current treatment      |       | 983 (12.5%)            |      | -                        |                      |       |
| glatiramer acetate        |       | 772 (9.8%)             |      | 217 (6.0%)               |                      |       |
| interferon beta           |       | 1587 (20.2%)           |      | 594 (16.5%)              |                      |       |
| teriflunomide             |       | 340 (4.3%)             |      | 195 (5.4%)               |                      |       |
| dimethyl fumarate         |       | 1078 (13.7%)           |      | 534 (14.8%)              |                      |       |
| fingolimod                |       | 870 (11.1%)            |      | 790 (21.9%)              |                      |       |
| natalizumab               |       | 1041 (13.2%)           |      | 1107 (30.7%)             |                      |       |
| B cell depleting therapy  |       | 128 (1.6%)             |      | 48 (1.3%)                |                      |       |
| cladribine                |       | 3 (0.0%)               |      | -                        |                      |       |
| alemtuzumab               |       | 73 (0.9%)              |      | 36 (1.0%)                |                      |       |
| other                     |       | 216 (2.7%)             |      | 81 (2.2%)                |                      |       |

The discovery population was enriched for older individuals with longer disease duration, while the replication population was composed of already collected data from unselected samples. This is reflected in the meaningful differences in age at last EDSS and disease duration. Differences in disease course, age at onset and disability scores were smaller, as indicated by the SMD, though significant given the sample sizes.

<sup>a</sup> When repeated EDSS were available, the reported age and scores correspond to the last recoded value.

<sup>b</sup> Mean (standard deviation); count (%)

<sup>c</sup> chi-square test; Fisher's exact test

ARMSS; age-related multiple sclerosis severity score; B cell depleting therapy, ocrelizumab and rituximab; EDSS, expanded disability status scale; n, non-missing observations; SMD, standardized mean difference.
