# Supplementary material for: Genetic analysis of multiple sclerosis severity identifies a novel locus and implicates CNS resilience as a major determinant of outcome
Source: Research Square preprint supplement (doi:10.21203/rs.3.rs-1723574/v1), 2022-06-10
Supplement: Supplementary file 3 [file 46749fe54ccd5aece1e2307e.pdf]

**Supplementary Table 1. Sample count by population and contributing center**

| Center | Country     | Discovery, n (%) | Replication, n (%) |
|--------|-------------|------------------|--------------------|
| MEL    | Australia   | 181 (1.4%)       | -                  |
| PER    | Australia   | 327 (2.6%)       | -                  |
| TAS    | Australia   | 63 (0.5%)        | -                  |
| UON    | Australia   | 310 (2.5%)       | -                  |
| MUG    | Austria     | 246 (2.0%)       | -                  |
| BEL    | Belgium     | 347 (2.8%)       | 51 (0.5%)          |
| CAL    | Canada      | 455 (3.6%)       | -                  |
| DEN    | Denmark     | -                | 286 (2.9%)         |
| TUM    | Germany     | 683 (5.4%)       | 2121 (21.6%)       |
| UMZ    | Germany     | 301 (2.4%)       | -                  |
| THE    | Greece      | 140 (1.1%)       | -                  |
| IT1    | Italy       | 1067 (8.5%)      | 58 (0.6%)          |
| IT2    | Italy       | 538 (4.3%)       | 447 (4.6%)         |
| EUR    | Netherlands | 209 (1.7%)       | -                  |
| NOR    | Norway      | 575 (4.6%)       | 63 (0.6%)          |
| SP1    | Spain       | 151 (1.2%)       | -                  |
| SP2    | Spain       | -                | 234 (2.4%)         |
| SWE    | Sweden      | 2751 (21.9%)     | 6059 (61.8%)       |
| UKC    | UK          | 943 (7.5%)       | 486 (5.0%)         |
| BWH    | USA         | 512 (4.1%)       | -                  |
| UCB    | USA         | 910 (7.2%)       | -                  |
| UCSF   | USA         | 1603 (12.7%)     | -                  |
| USM    | USA         | 272 (2.2%)       | -                  |
| Total  |             | 12584            | 9805               |

Centers could contribute samples to both the discovery and replication population; however, no individual overlapped between the two
