# Supplementary material for: Genetic analysis of multiple sclerosis severity identifies a novel locus and implicates CNS resilience as a major determinant of outcome
Source: Research Square preprint supplement (doi:10.21203/rs.3.rs-1723574/v1), 2022-06-10
Supplement: Supplementary file 4 [file 63a50c8226fe2ba13efa5faf.pdf]

Supplementary Table 3. Cohort-level quality control

| Cohort             | Platform                 | Starting samples <sup>c</sup> | Starting SNVs <sup>d</sup> | Samples CR > 0.95, deduplicated | Samples no sex mismatch <sup>e</sup> | SNVs pass cohort QC <sup>f</sup> | Samples unrelated, het  F  < 0.2 |
|--------------------|--------------------------|-------------------------------|----------------------------|---------------------------------|--------------------------------------|----------------------------------|----------------------------------|
| <b>Discovery</b>   |                          |                               |                            |                                 |                                      |                                  |                                  |
| cPRG <sup>a</sup>  | IlluminaGSA              | 9863                          | 695905                     | 9469                            | 9431                                 | 555560                           | 9296                             |
| cSWE1              | IlluminaGSA              | 4194                          | 691954                     | 4079                            | 4022                                 | 566458                           | 3891                             |
| cNOR               | IlluminaGSA              | 542                           | 691859                     | 542                             | 542                                  | 525995                           | 529                              |
| cBEL1 <sup>b</sup> | IlluminaGSA              | 347                           | 498725                     | 347                             | 347                                  | 466914                           | 347                              |
| <b>Replication</b> |                          |                               |                            |                                 |                                      |                                  |                                  |
| cBEL2              | Illumina670              | 174                           | 561353                     | 174                             | 174                                  | 549684                           | 174                              |
| cDEN               | Illumina660              | 328                           | 559414                     | 328                             | 328                                  | 546859                           | 328                              |
| cUKC               | Illumina670              | 666                           | 553258                     | 666                             | n.a.                                 | 536876                           | 666                              |
| cGER1              | Illumina670              | 1053                          | 567693                     | 1053                            | 1050                                 | 549926                           | 1045                             |
| cGER2              | IlluminaOmniExpress      | 2681                          | 712283                     | 2659                            | 2637                                 | 607925                           | 2611                             |
| cIT1               | Illumina550              | 370                           | 493211                     | 370                             | n.a.                                 | 492476                           | 370                              |
| cIT2.1             | Illumina550              | 320                           | 493210                     | 320                             | n.a.                                 | 492277                           | 320                              |
| cIT2.2             | IlluminaOmniExpress      | 1146 (774)                    | 720169                     | 1135                            | 1116                                 | 641463                           | 240                              |
| cIT2.3             | IlluminaOmni2.5          | 317                           | 2235110                    | 291                             | 269                                  | 1806623                          | 1107                             |
| cNOR1              | Illumina670              | 131                           | 545752                     | 131                             | n.a.                                 | 537003                           | 131                              |
| cNOR2              | IlluminaGSA              | 825                           | 548000                     | 825                             | 822                                  | 491820                           | 809                              |
| cNOR3              | IlluminaOmniExpress      | 138 (98)                      | 658234                     | 138                             | 137                                  | 536865                           | 64                               |
| cNOR4              | IlluminaOmniExpressExome | 64 (31)                       | 670362                     | 64                              | 64                                   | 640833                           | 137                              |
| cSP2               | IlluminaMEGA             | 288                           | 978314                     | 288                             | 278                                  | 793673                           | 277                              |
| cSWE2              | IlluminaGSA              | 5743 (4194)                   | 583755                     | 5710                            | 5590                                 | 498003                           | 5473                             |
| cSWE3              | IlluminaOmniExpress      | 13651 (7258)                  | 704358                     | 13651                           | 13648                                | 641875                           | 13496                            |
| cSWE4              | Illumina660              | 1362 (732)                    | 509975                     | 1362                            | 1362                                 | 506050                           | 1337                             |

<sup>a</sup> Samples from this cohort (internally referred to as 'Progression GWAS [PRG]') were genotyped at the Hussman Institute for Human Genomics Genotyping Core, University of Miami (n = 5430) and the Institute for Molecular Medicine Finland (FIMM), University of Helsinki (n = 4433); genotypes were called jointly.

<sup>b</sup> This dataset was subjected to local quality control prior to inclusion in this study (PMID: 33704824). To ensure consistency between cohorts, the same quality control filters were still applied.

<sup>c</sup> Where the sample count included controls (only for quality control and removed prior to analysis), the multiple sclerosis case count is indicated in parenthesis

<sup>d</sup> Count excludes mitochondrial variants and indels. Genomic positions were assigned on the same build and alleles oriented to the forward strand

<sup>e</sup> n.a. indicates that the cohort did not include sex chromosome data, and therefore a mismatch between genetic and reported sex could not be assessed

<sup>f</sup> See Supplementary Note for the details of tests performed for cohort-level variant QC

CR, call rate; het |F|, absolute inbreeding coefficient estimate F
