# Supplementary material for: Genetic analysis of multiple sclerosis severity identifies a novel locus and implicates CNS resilience as a major determinant of outcome
Source: Research Square preprint supplement (doi:10.21203/rs.3.rs-1723574/v1), 2022-06-10
Supplement: Supplementary file 5 [file d0ea4f4304e89db51be9fea9.pdf]

## Table index

|                               |                                                                                                         |
|-------------------------------|---------------------------------------------------------------------------------------------------------|
| <b>Supplementary Table 1</b>  | Center sample count by population                                                                       |
| <b>Supplementary Table 2</b>  | Demographic characteristics by population                                                               |
| <b>Supplementary Table 3</b>  | Cohort-level quality control                                                                            |
| <b>Supplementary Table 4</b>  | Stratum-level quality control                                                                           |
| <b>Supplementary Table 5</b>  | SNP-heritability estimates                                                                              |
| <b>Supplementary Table 6</b>  | Partitioned heritability analysis using functional annotation categories                                |
| <b>Supplementary Table 7</b>  | Heritability enrichment in tissues and cell types for MS severity                                       |
| <b>Supplementary Table 8</b>  | Heritability enrichment in tissues and celltypes for MS susceptibility                                  |
| <b>Supplementary Table 9</b>  | MS severity genome-wide significant and suggestive variants in the discovery population                 |
| <b>Supplementary Table 10</b> | Gene prioritization strategies at MS severity loci                                                      |
| <b>Supplementary Table 11</b> | Methylation quantitative trait locus effects for MS severity variants in dorsolateral prefrontal cortex |
| <b>Supplementary Table 12</b> | Expression and splicing quantitative trait locus effects for MS severity variants                       |
| <b>Supplementary Table 13</b> | rs10191329_A association with other traits                                                              |
| <b>Supplementary Table 14</b> | rs149097173_T association with other traits                                                             |
| <b>Supplementary Table 15</b> | Association of known MS susceptibility variants with disability outcomes                                |
| <b>Supplementary Table 16</b> | Description of exposures included in Mendelian randomization analysis                                   |
| <b>Supplementary Table 17</b> | Mendelian randomization results                                                                         |
